# Supplementary material for: Structural analysis of two foldamer-type oligoamides – the effect of hydrogen bonding on solvate formation, crystal structures and molecular conformation
Source: Royal Society of Chemistry journal article supplement (doi:10.1039/c2ce25981h), 2012-01-01

**Structural analysis of two foldamer-type oligoamides – the  
effect of hydrogen bonding on solvate formation, crystal  
structures and molecular conformation**

Supplementary information

**Aku Suhonen, Elisa Nauha, Kirsi Salorinne, Kaisa Helttunen and Maija Nissinen**

## Contents

|     |                                                        |    |
|-----|--------------------------------------------------------|----|
| 1   | Crystallography .....                                  | 3  |
| 1.1 | Crystal data and collection parameters .....           | 3  |
| 1.2 | MeOH-solvate of the pyridine variant 3 .....           | 4  |
| 1.3 | Toluene solvate of the pyridine variant .....          | 5  |
| 1.4 | Notes on the crystallographic data.....                | 6  |
| 2   | Hydrogen bonding parameters.....                       | 8  |
| 3   | Solvent table for crystallizations of compound 2 ..... | 10 |
| 4   | NMR spectra of compounds 1, 2 and 3 .....              | 11 |
| 4.1 | <i>N</i> -Benzoyl-2-amino aniline 1.....               | 12 |
| 4.2 | Benzene variant 2.....                                 | 13 |
| 4.3 | Pyridine variant 3.....                                | 16 |
| 5   | NOESY spectra of the pyridine variant 3 .....          | 19 |
| 6   | TGA-DTA measurements.....                              | 21 |

## 1 Crystallography

### 1.1 Crystal data and data collection parameters

**Table 1.** Crystal data and data collection parameters of isostructural solvate structures of **3**.

|                                       | 3-MeOH                                                                           | 3-toluene <sup>a</sup>                                                                        |
|---------------------------------------|----------------------------------------------------------------------------------|-----------------------------------------------------------------------------------------------|
| Formula                               | C <sub>33</sub> H <sub>25</sub> N <sub>5</sub> O <sub>4</sub> ·CH <sub>4</sub> O | 2C <sub>33</sub> H <sub>25</sub> N <sub>5</sub> O <sub>4</sub> ·C <sub>7</sub> H <sub>8</sub> |
| M/gmol <sup>-1</sup>                  | 587.62                                                                           | 1203.29                                                                                       |
| Crystal system                        | monoclinic                                                                       | monoclinic                                                                                    |
| Space group                           | P2 <sub>1</sub> /c                                                               | P21/c                                                                                         |
| a/Å                                   | 12.7568                                                                          | 12.4748(5)                                                                                    |
| b/Å                                   | 16.6186                                                                          | 16.6624(5)                                                                                    |
| c/Å                                   | 16.5266                                                                          | 14.8765(6)                                                                                    |
| β/°                                   | 124.487(3)                                                                       | 92.7042                                                                                       |
| V/Å <sup>3</sup>                      | 2887.9(2)                                                                        | 3088.8                                                                                        |
| Z                                     | 4                                                                                | 2                                                                                             |
| ρ <sub>calc</sub> /g cm <sup>-3</sup> | 1.352                                                                            | 1.294                                                                                         |
| Meas. reflns                          | 7582                                                                             | 7311                                                                                          |
| Indep. Reflns                         | 4714                                                                             | 4844                                                                                          |
| R <sub>int</sub>                      | 0.1038                                                                           | 0.0785                                                                                        |
| R <sub>1</sub> [I > 2σ(I)]            | 0.0732                                                                           | 0.0953                                                                                        |
| wR <sub>2</sub> [I > 2σ(I)]           | 0.1622                                                                           | 0.1938                                                                                        |
| GooF                                  | 1.068                                                                            | 1.076                                                                                         |

<sup>a</sup> Low data completeness (88.1%)

### 1.2 MeOH-solvate of the pyridine variant 3

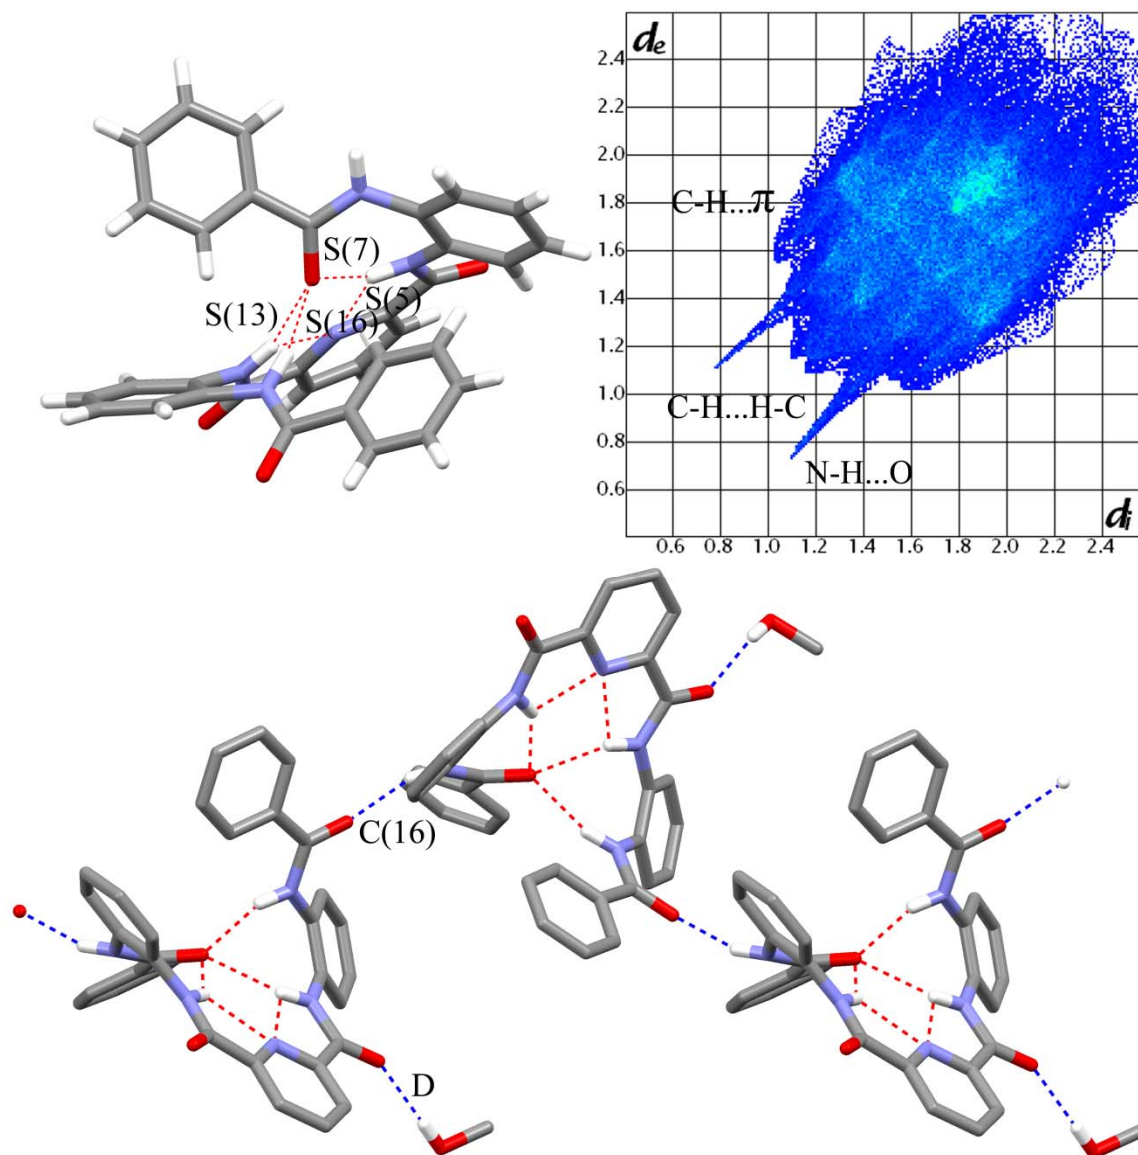

**Fig. 1** Molecular conformation, fingerprint plot and the crystal packing of 3-MeOH solvate of the pyridine variant **3**. Non-hydrogen-bonded hydrogen atoms and solvent disorder were removed for clarity.

### 1.3 Toluene solvate of the pyridine variant 3

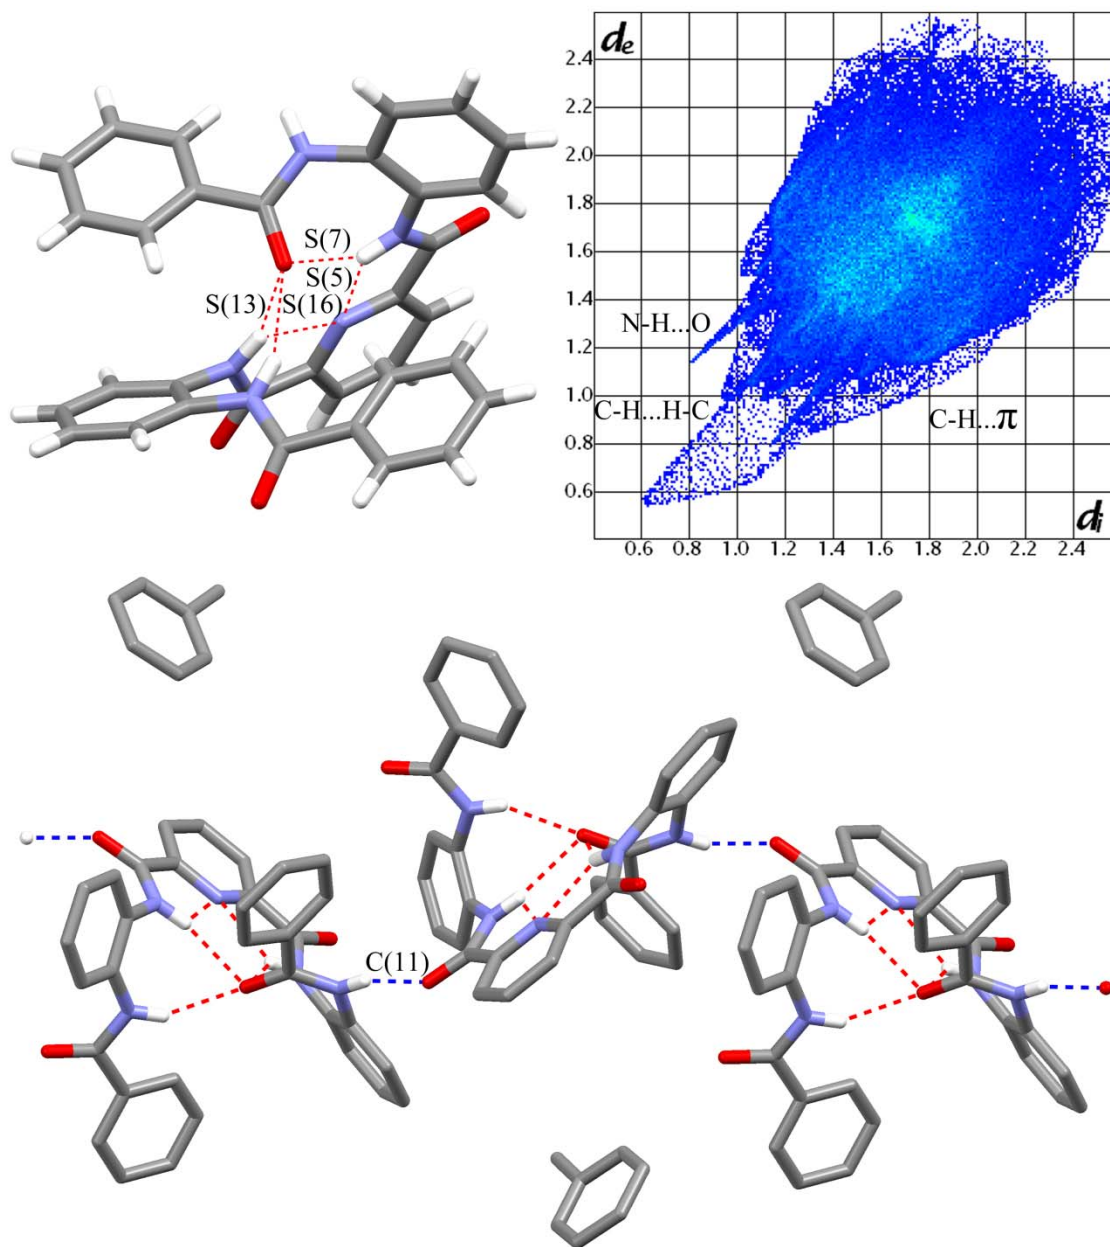

**Fig. 2** Molecular conformation, fingerprint plot and the crystal packing of 3-toluene solvate of the pyridine variant 3. Non-hydrogen-bonded hydrogen atoms and solvent disorder were removed for clarity.

#### 1.4 Notes on the crystallographic data

**2-Form I** was crystallized from DMF by slow evaporation as colorless plate crystals. Bond lengths between nitrogen and hydrogen were restrained to 0.91 Å using DFIX.

**2-DMSO I** was crystallized from EtOAc-DMSO by slow evaporation as colorless plate crystals. DMSO molecule is disordered over two positions (site occupancies 70:30 for the oxygen atom). Short intramolecular hydrogen-hydrogen distance of 1.90 Å between H2N and H16 is caused by the intramolecular hydrogen bond between H1N and O2.

**2-DMSO II** was crystallized from DMSO by slow evaporation as colorless block crystals.

**3-Form I** was crystallized from EtOAc by slow evaporation as colorless block crystals. One of the benzene rings is partially disordered at C30-C31-C32-C33 (restrained as 50:50). The structure contains voids of 33 Å<sup>3</sup>.

**3-EtOH** was crystallized from EtOH by slow evaporation as colorless plate crystals. The bond length of the hydrogen and oxygen of the solvent hydroxyl group is restrained to 0.84 Å using DFIX.

**3-MeOH** was crystallized from MeOH by slow evaporation as colorless plate crystals. The methanol solvent is disordered over two positions (site occupancies 84:16). There is a short intermolecular distance between H31...H40E due to the disorder of the solvent molecule. The bond lengths between nitrogen and hydrogen are restrained to 0.91 Å using DFIX. Short intermolecular hydrogen-hydrogen distance (H31..H40E, 1.81 Å) is caused by disorder of the solvent molecule. Short intramolecular hydrogen-hydrogen distance of 1.99 Å between H1N and H1 is caused by the intramolecular hydrogen bond between H1N and O4 and an intermolecular hydrogen bond between O1 and H4N.

**3-EtOAc** was crystallized from hot EtOAc during recrystallization purification as colorless plate crystals. Severely disorder of solvent molecules (one molecule of EtOAc per two molecules of **3**) were removed using SQUEEZE routine of the PLATON program<sup>15</sup>, which caused voids in the structure (188 Å<sup>3</sup>). One of the benzene rings of compound **3** is disordered (C1-C2-C3-C4-C5-C6, restrained as 50:50) and restrained using EADP and SADI and forced to a planar ring conformation using AFIX 66. The differences between the calculated and the experimental absorption coefficient and molecular weight are caused by the ethyl acetate reported in the formula that was squeezed out of the molecule.

**3-toluene** was crystallized from toluene by slow evaporation as colorless plate crystals. Compound **3** has a disordered benzene ring (C1-C2-C3-C4-C5-C6, restrained as 50:50). The short intramolecular distance between H1N and H5A is caused by the benzene ring disorder. Bond length between N1 and H1N is restrained to 0.91 with DFIX. The short intermolecular X-Y contact between C4B...C106, C4B...C105, C5B...C106 and C18...C103 is caused by the disorder of the benzene ring of compound **3** and the disorder of the toluene solvent. The disordered solvent molecule was refined isotropically. Large Hirshfeld difference between C7 and C6B is caused by the disorder of the benzene ring of compound **3** and the disorder of the toluene solvent. Low data completeness (88.1 %) is caused by poor crystal quality.

**3-DMF** was crystallized from DMF by slow evaporation as colorless plate crystals. The DMF solvent is disordered over two positions (88:12).

**3-DMSO** was crystallized from DMSO solution overnight as colorless block crystals. Compound **3** was dissolved in DMSO with heating.

## 2 Hydrogen bonding parameters

**Table 2.** Hydrogen bonding parameters for the crystal structures of the benzene variant **2**.

### 2-Form I

| Intramolecular |          |        | Intermolecular |          |        |
|----------------|----------|--------|----------------|----------|--------|
| Bond           | d(D...A) | <(DHA) | Bond           | d(D...A) | <(DHA) |
| N2-H2N...O1    | 2.740(3) | 153(3) | N1-H1N...O2    | 2.897(3) | 148(3) |
| N4-H4N...O3    | 2.714(3) | 151(3) | N3-H3N...O4    | 2.890(3) | 158(3) |

### 2-DMSO I

| Intramolecular |          |        | Intermolecular |          |        |
|----------------|----------|--------|----------------|----------|--------|
| Bond           | d(D...A) | <(DHA) | Bond           | d(D...A) | <(DHA) |
| N1-H1N...O2    | 2.714(4) | 146(4) | N2-H2N...O1    | 2.916(5) | 157(4) |
| N4-H4N...O3    | 2.717(4) | 143(4) | N3-H3N...O4    | 2.915(5) | 161(4) |

### 2-DMSO II

| Intramolecular |          |        | Intermolecular |          |        |
|----------------|----------|--------|----------------|----------|--------|
| Bond           | d(D...A) | <(DHA) | Bond           | d(D...A) | <(DHA) |
| N4-H4N...O3    | 2.662(3) | 150(3) | N2-H2N...O1    | 2.929(3) | 162(3) |
| N1-H1N...O2    | 2.529(?) | 96(?)  | N3-H3N...O4    | 2.943(3) | 161(3) |
|                |          |        | N1-H1N...O100  | 2.863(3) | 159(3) |



**Table 3.** Hydrogen bonding parameters for the pyridine variant **3**.

**3-Form I**

| Intramolecular |          |        | Intermolecular |          |        |
|----------------|----------|--------|----------------|----------|--------|
| Bond           | d(D...A) | <(DHA) | Bond           | d(D...A) | <(DHA) |
| N1-H1N...O4    | 2.928(4) | 166(3) | N4-H4N...O3    | 2.892(3) | 155(3) |
| N2-H2N...O4    | 3.179(3) | 144(3) |                |          |        |
| N2-H2N...N5    | 2.677(4) | 117(2) |                |          |        |
| N3-H3N...O4    | 2.699(3) | 145(3) |                |          |        |
| N3-H3N...N5    | 2.643(3) | 111(3) |                |          |        |

**3-MeOH**

| Intramolecular |          |        | Intermolecular |          |        |
|----------------|----------|--------|----------------|----------|--------|
| Bond           | d(D...A) | <(DHA) | Bond           | d(D...A) | <(DHA) |
| N1-H1N...O4    | 2.904(4) | 159(4) | N4-H4N...O1    | 2.853(4) | 161(4) |
| N2-H2N...O4    | 3.074(4) | 155(4) | O40A-H40A...O2 | 2.760(5) | 155    |
| N2-H2N...N5    | 2.666(5) | 109(3) |                |          |        |
| N3-H3N...O4    | 2.748(4) | 143(4) |                |          |        |
| N3-H3N...N5    | 2.660(5) | 111(3) |                |          |        |

**3-EtOH**

| Intramolecular |          |        | Intermolecular |          |        |
|----------------|----------|--------|----------------|----------|--------|
| Bond           | d(D...A) | <(DHA) | Bond           | d(D...A) | <(DHA) |
| N1-H1N...O4    | 2.922(3) | 163(3) | N4-H4N...O1    | 2.876(3) | 167(3) |
| N2-H2N...O4    | 3.044(3) | 155(3) | O100-H100...O2 | 2.786(3) | 175(4) |
| N2-H2N...N5    | 2.671(?) | 109(?) |                |          |        |
| N3-H3N...O4    | 2.758(3) | 146(2) |                |          |        |
| N3-H3N...N5    | 2.652(?) | 108(?) |                |          |        |

**3-EtOAc**

| Intramolecular |          |        | Intermolecular |          |        |
|----------------|----------|--------|----------------|----------|--------|
| Bond           | d(D...A) | <(DHA) | Bond           | d(D...A) | <(DHA) |
| N1-H1N...O4    | 2.928(4) | 166(3) | N4-H4N...O3    | 2.892(3) | 155(3) |
| N2-H2N...O4    | 3.179(3) | 144(3) |                |          |        |
| N2-H2N...N5    | 2.677(4) | 117(2) |                |          |        |
| N3-H3N...O4    | 2.699(3) | 145(3) |                |          |        |
| N3-H3N...N5    | 2.643(3) | 111(3) |                |          |        |

**3-toluene**

| Intramolecular |          |        | Intermolecular |          |        |
|----------------|----------|--------|----------------|----------|--------|
| Bond           | d(D...A) | <(DHA) | Bond           | d(D...A) | <(DHA) |
| N1-H1N...O1    | 2.934(6) | 150(6) | N4-H4N...O2    | 2.934(6) | 164(6) |
| N2-H2N...O1    | 3.023(7) | 150(6) |                |          |        |
| N2-H2N...N5    | 2.626(7) | 110(5) |                |          |        |
| N3-H3N...O1    | 2.785(6) | 136(6) |                |          |        |
| N3-H3N...N5    | 2.639(7) | 118(5) |                |          |        |

### 3-DMF

| Intramolecular |          |        | Intermolecular |          |        |
|----------------|----------|--------|----------------|----------|--------|
| Bond           | d(D...A) | <(DHA) | Bond           | d(D...A) | <(DHA) |
| N2-H2N...O1    | 2.700(3) | 143(3) | N1-H1N...O2    | 2.960(3) | 166(3) |
| N2-H2N...N5    | 2.647(3) | 112(2) |                |          |        |
| N3-H3N...O1    | 3.098(3) | 147(3) |                |          |        |
| N3-H3N...N5    | 2.654(3) | 115(3) |                |          |        |
| N4-H4N...O1    | 2.856(3) | 153(3) |                |          |        |

### 3-DMSO

| Intramolecular |          |        | Intermolecular |          |        |
|----------------|----------|--------|----------------|----------|--------|
| Bond           | d(D...A) | <(DHA) | Bond           | d(D...A) | <(DHA) |
| N2-H2N...O1    | 2.759(3) | 149(3) | N1-H1N...O3    | 2.848(3) | 163(3) |
| N2-H2N...N5    | 2.644(?) | 108(?) | N4-H4N...O100  | 2.896(3) | 171(3) |
| N3-H3N...O1    | 3.031(3) | 143(3) |                |          |        |
| N3-H3N...N5    | 2.657(3) | 113(3) |                |          |        |

## 3 Solvent table for crystallizations of compound 2

### Compound 2

| 2-Form I<br>Solvent | Solvate form 1 |           | Solvate form 2<br>Solvent | Solvate form 3 |            |
|---------------------|----------------|-----------|---------------------------|----------------|------------|
|                     | Solvent 1      | Solvent 2 |                           | Solvent 1      | Solvent 2  |
| DCE                 | DMSO           | EtOAc     | DMSO                      | EtOAc          |            |
| DMF                 | DCM            |           |                           | DMF            | Chloroform |
| EtOH                | THF            |           |                           | DMF            | EtOAc      |
| MeCN                |                |           |                           | DMF            | THF        |
| MeOH                |                |           |                           | DMF            | Toluene    |
|                     |                |           |                           | DMA            | EtOH       |
|                     |                |           |                           | DMA            | MeOH       |
|                     |                |           |                           | DMA            | MeCN       |

#### 4 NMR spectra of compounds 1, 2 and 3

$^1\text{H}$ ,  $^{13}\text{C}$ , COSY, HMBC and HMQC spectra were measured for compounds **2** and **3** from DMSO- $d_6$ .  $^1\text{H}$ ,  $^{13}\text{C}$  spectra for compound **1** were measured from DMSO- $d_6$ . For clarity the spectra have been scaled to display only the aromatic and the N-H peaks, and in the  $^1\text{H}$  and  $^{13}\text{C}$  spectra only the aromatic peaks.

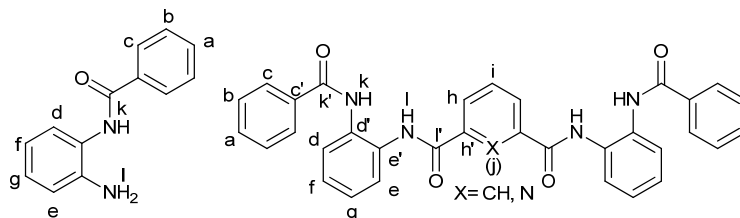

### 4.1 *N*-Benzoyl-2-amino aniline 1

<sup>1</sup>H spectra

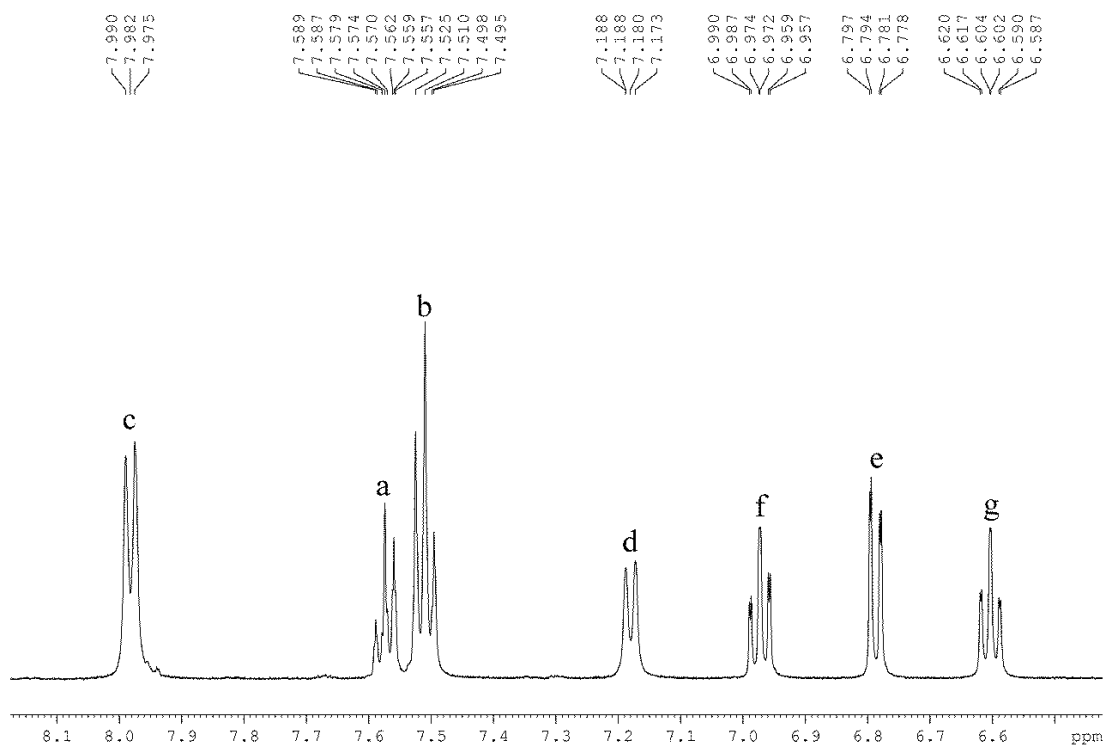

<sup>13</sup>C spectra

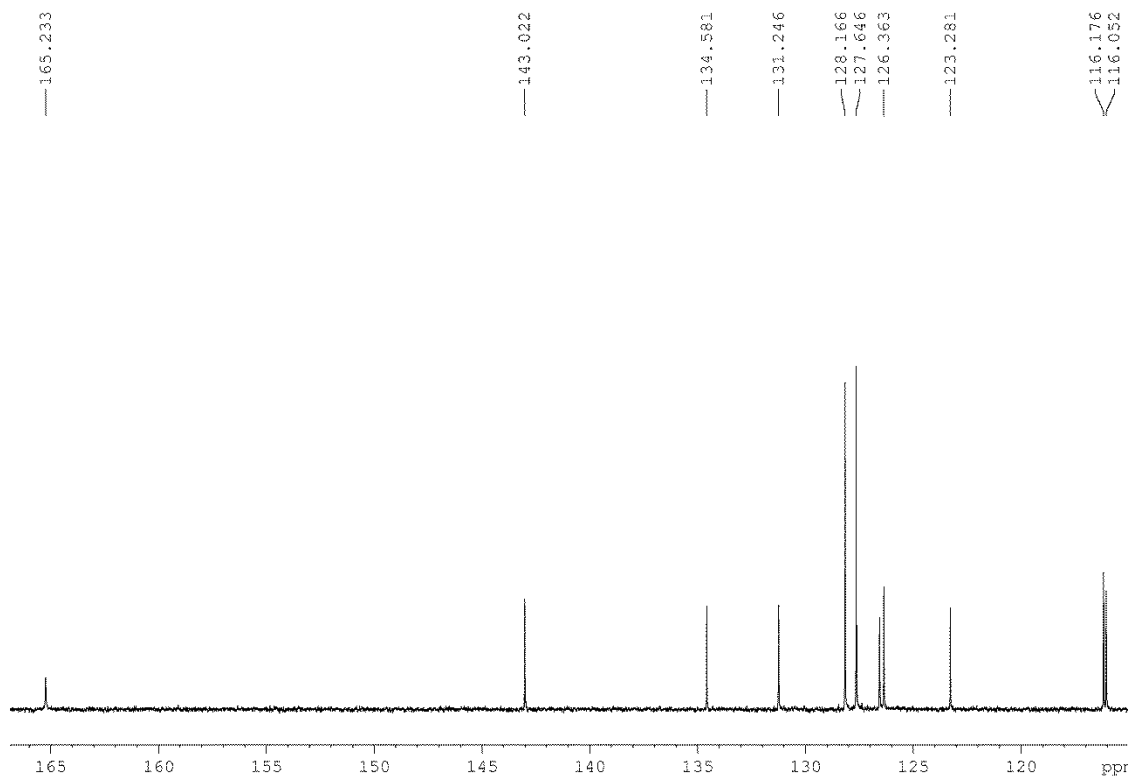

## 4.2 Benzene variant 2

### <sup>1</sup>H spectra

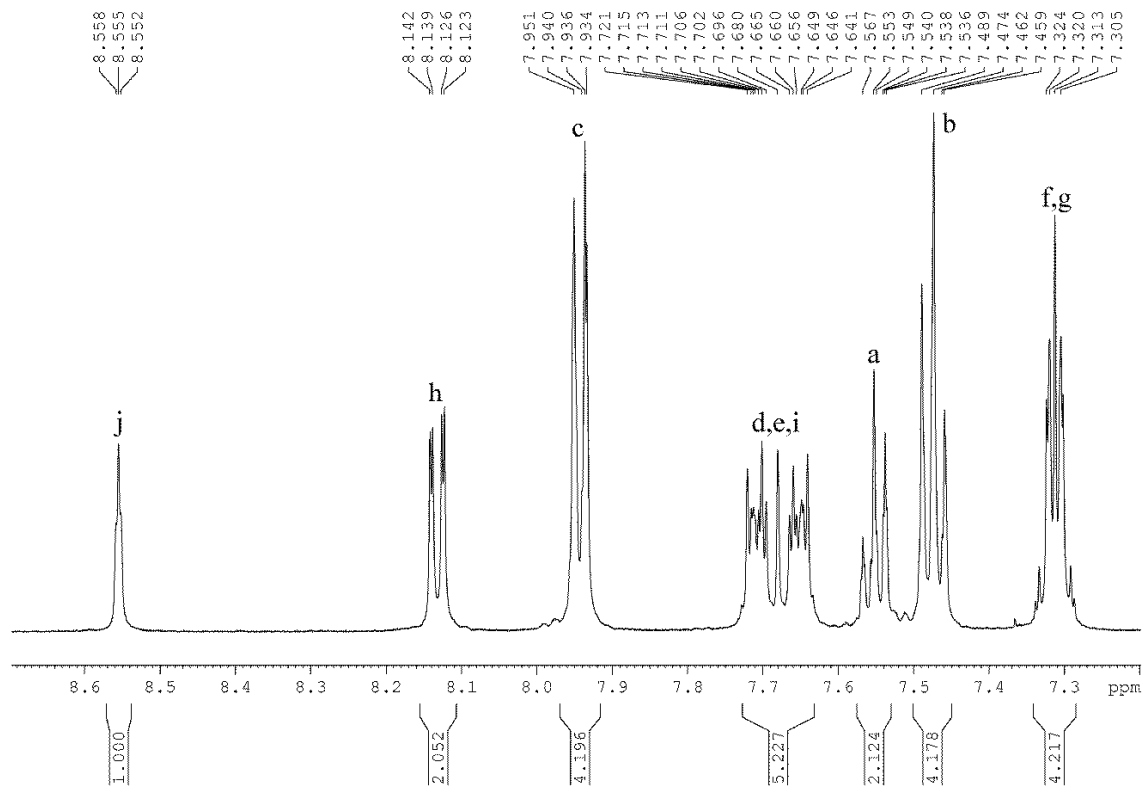

### <sup>13</sup>C spectra

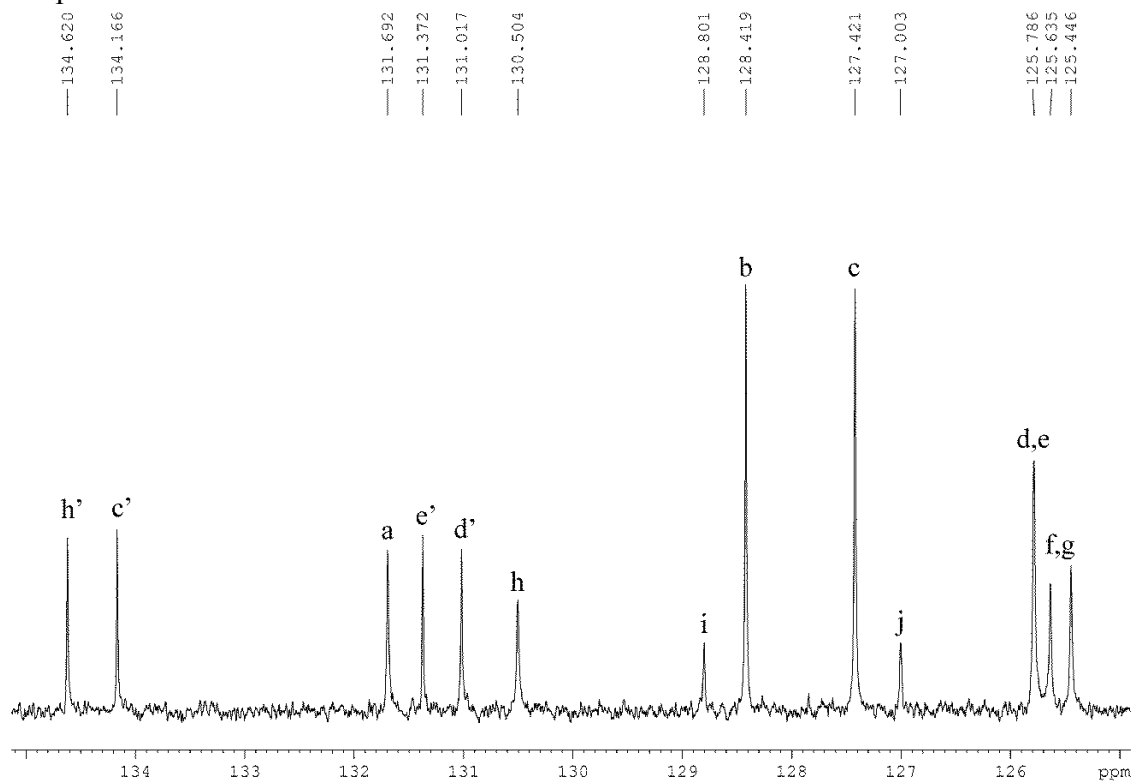

COSY

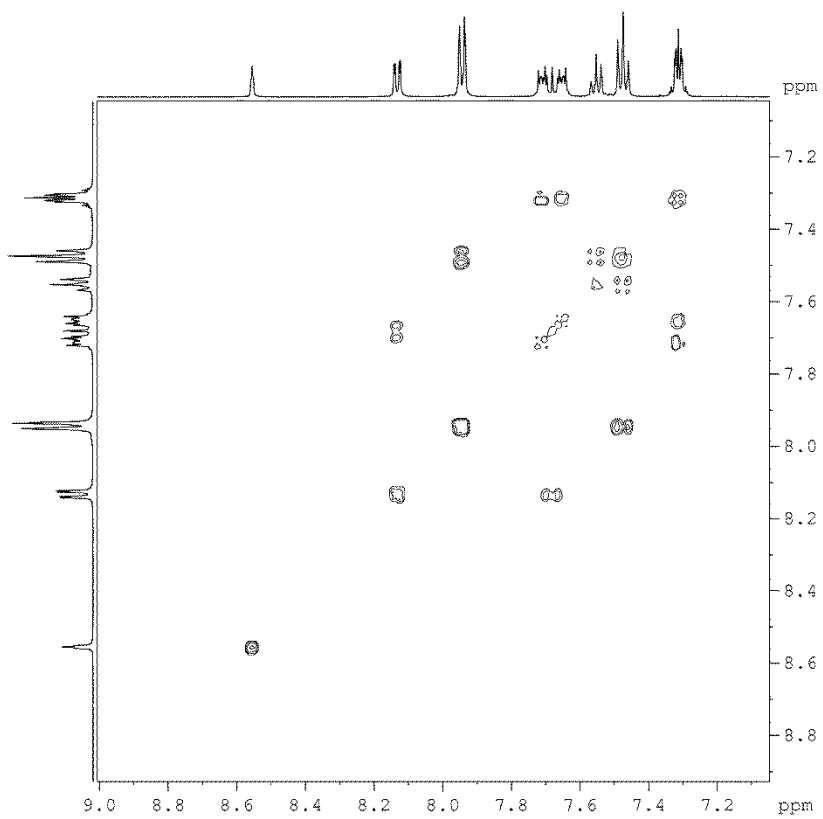

HMQC

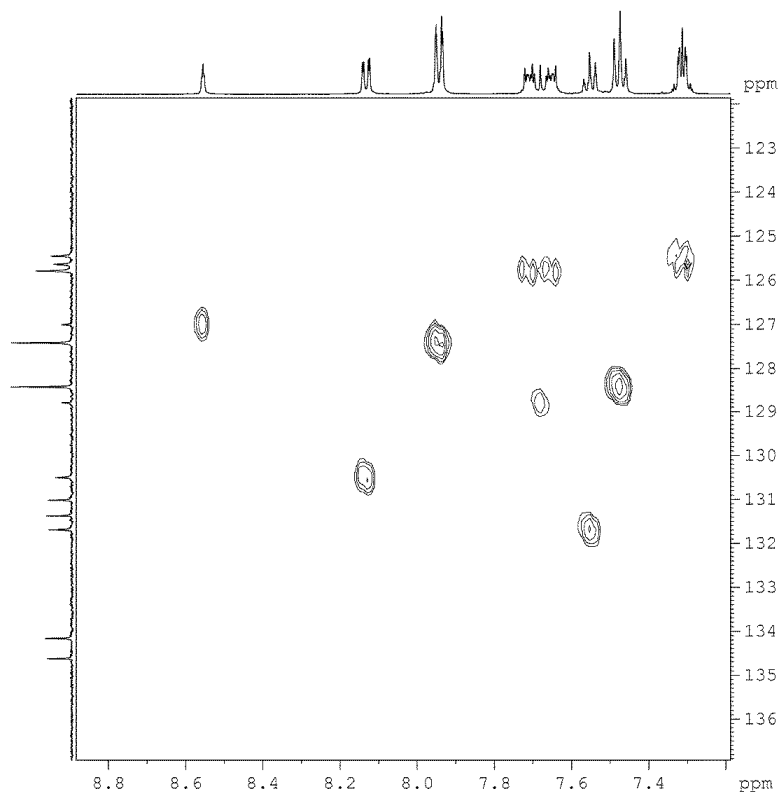

HMBC

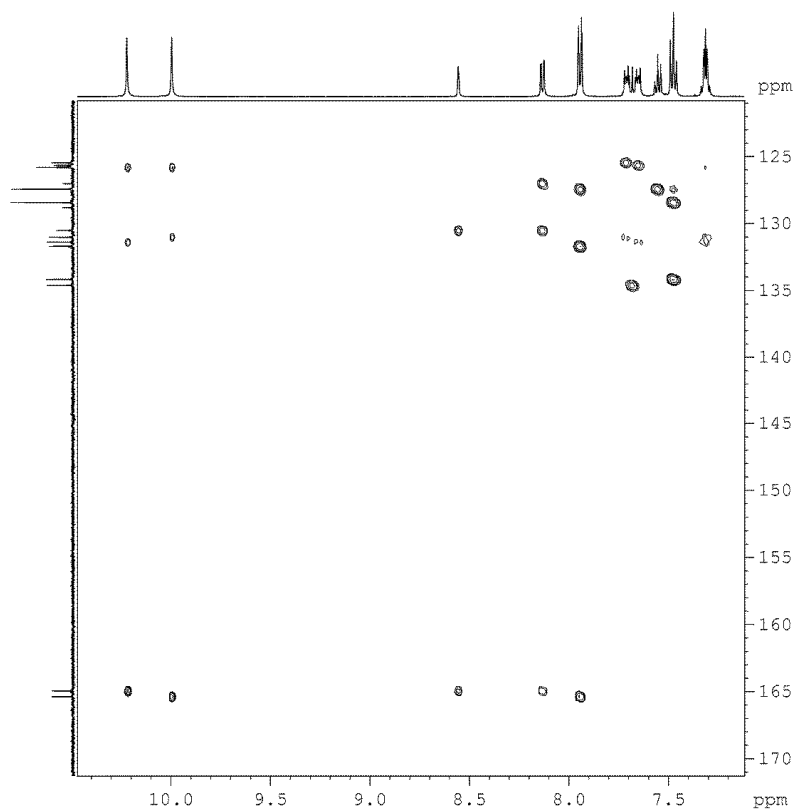

### 4.3 Pyridine variant 3

#### <sup>1</sup>H spectra

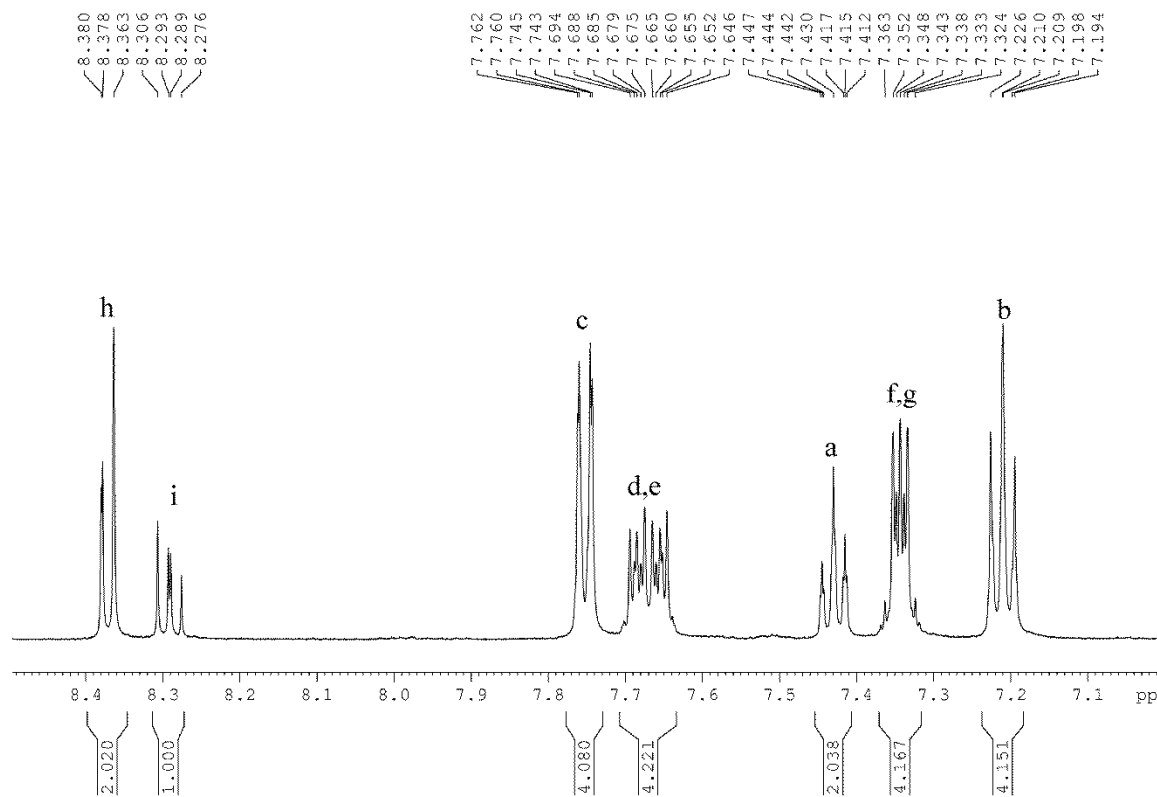

#### <sup>13</sup>C spectra

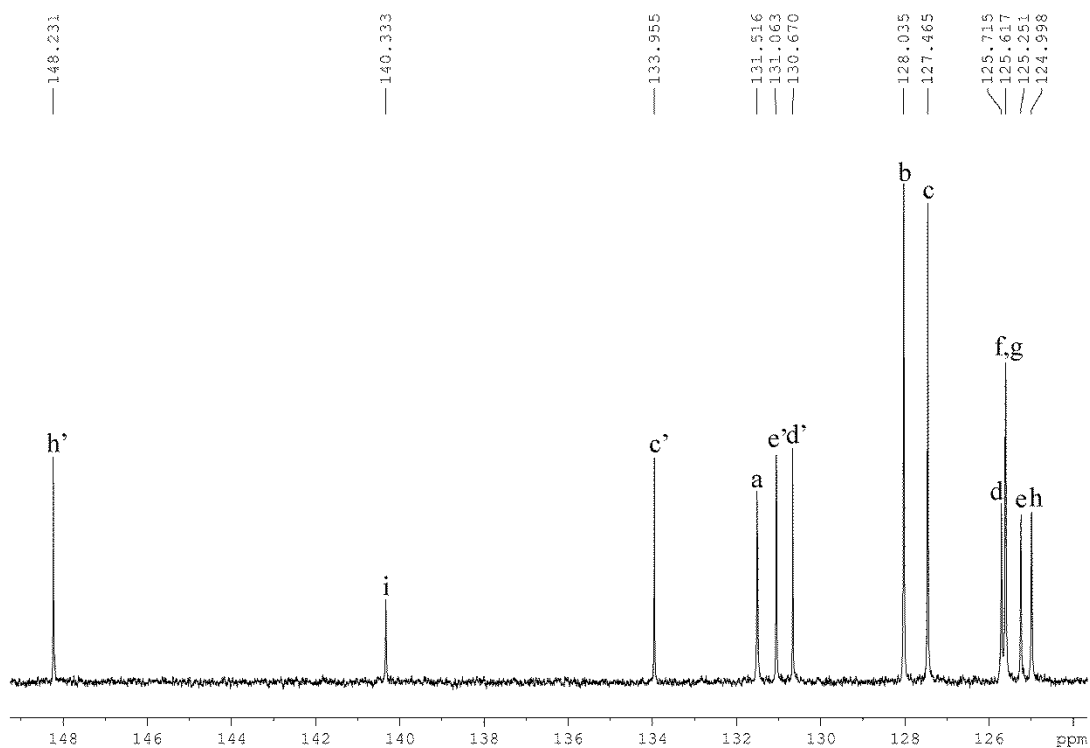



COSY

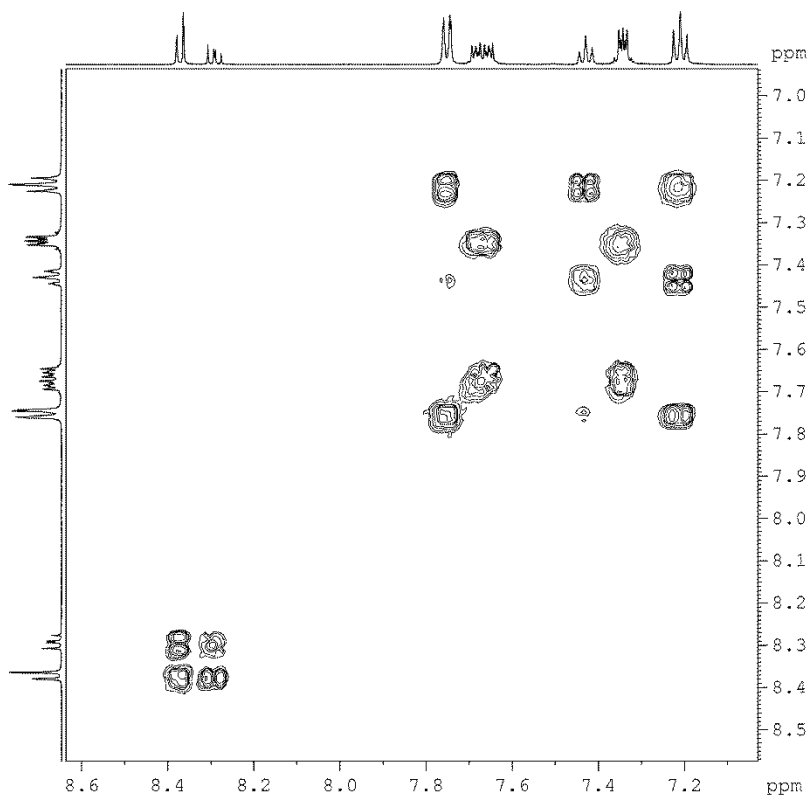

HMQC

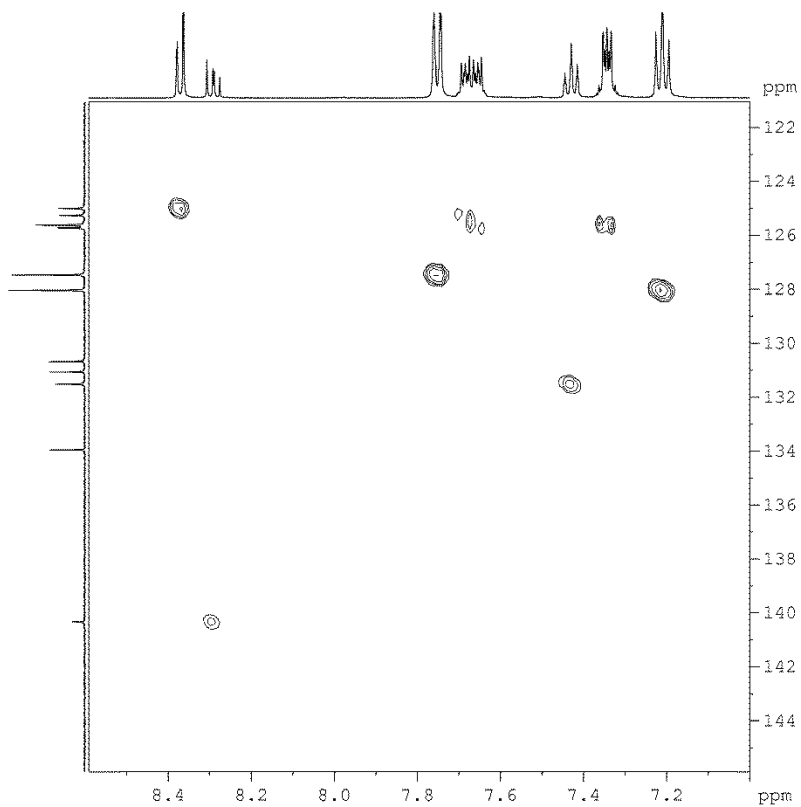

HMBC

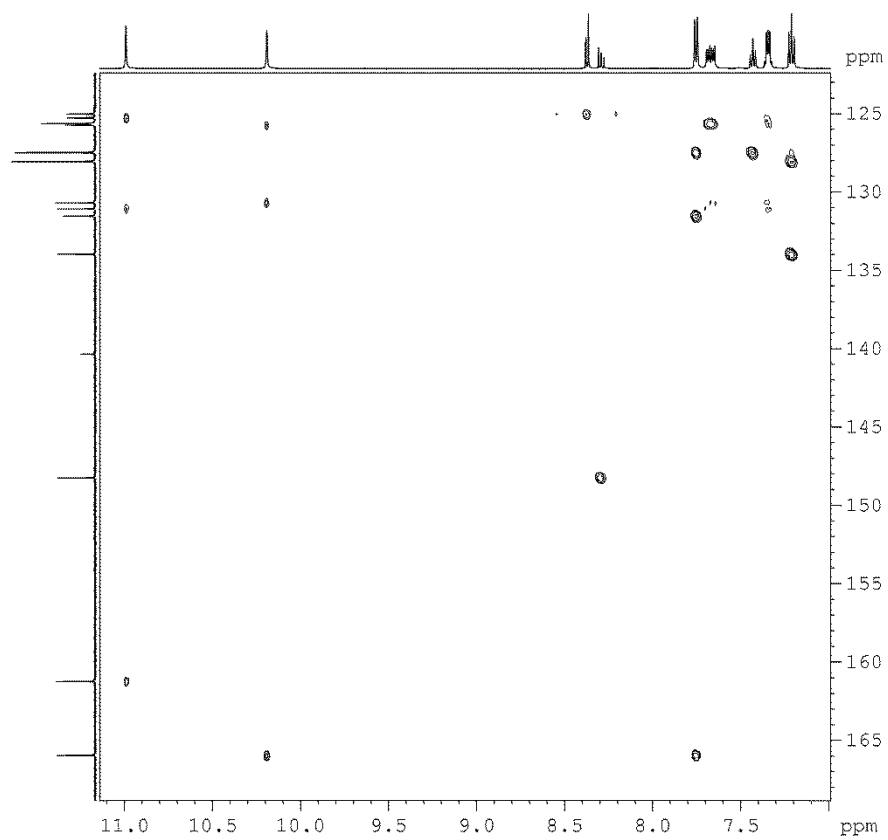

## 5 NOESY spectra of the pyridine variant 3

NOESY spectra were measured for compound **3** in acetone- $d_6$  and THF- $d_8$ . For clarity the spectra have been scaled to display only the aromatic and the N-H peaks.

Acetone- $d_6$

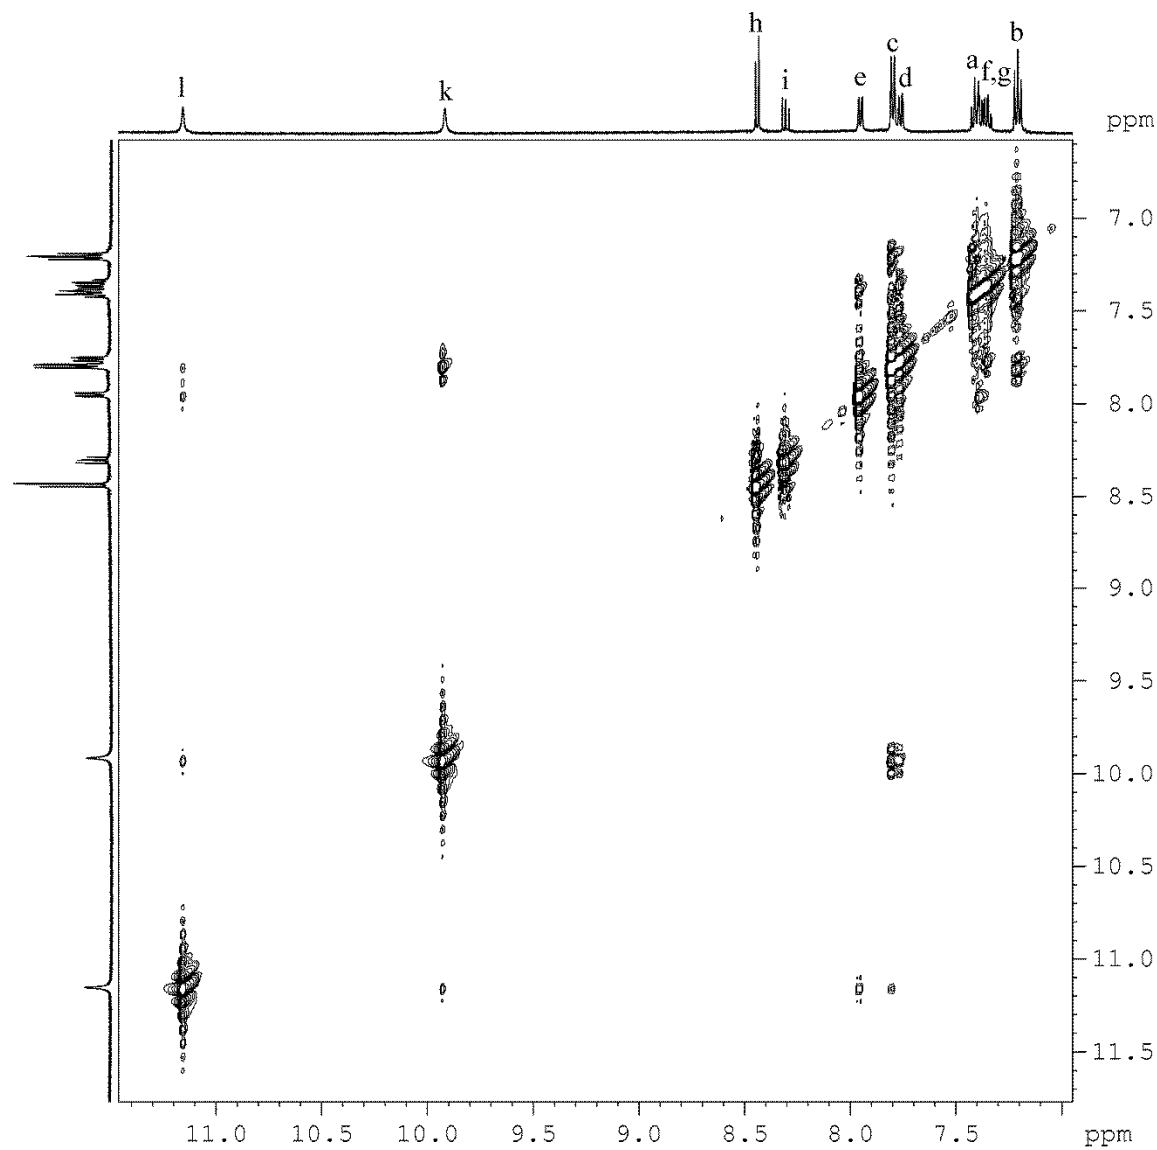

THF-d<sub>8</sub>

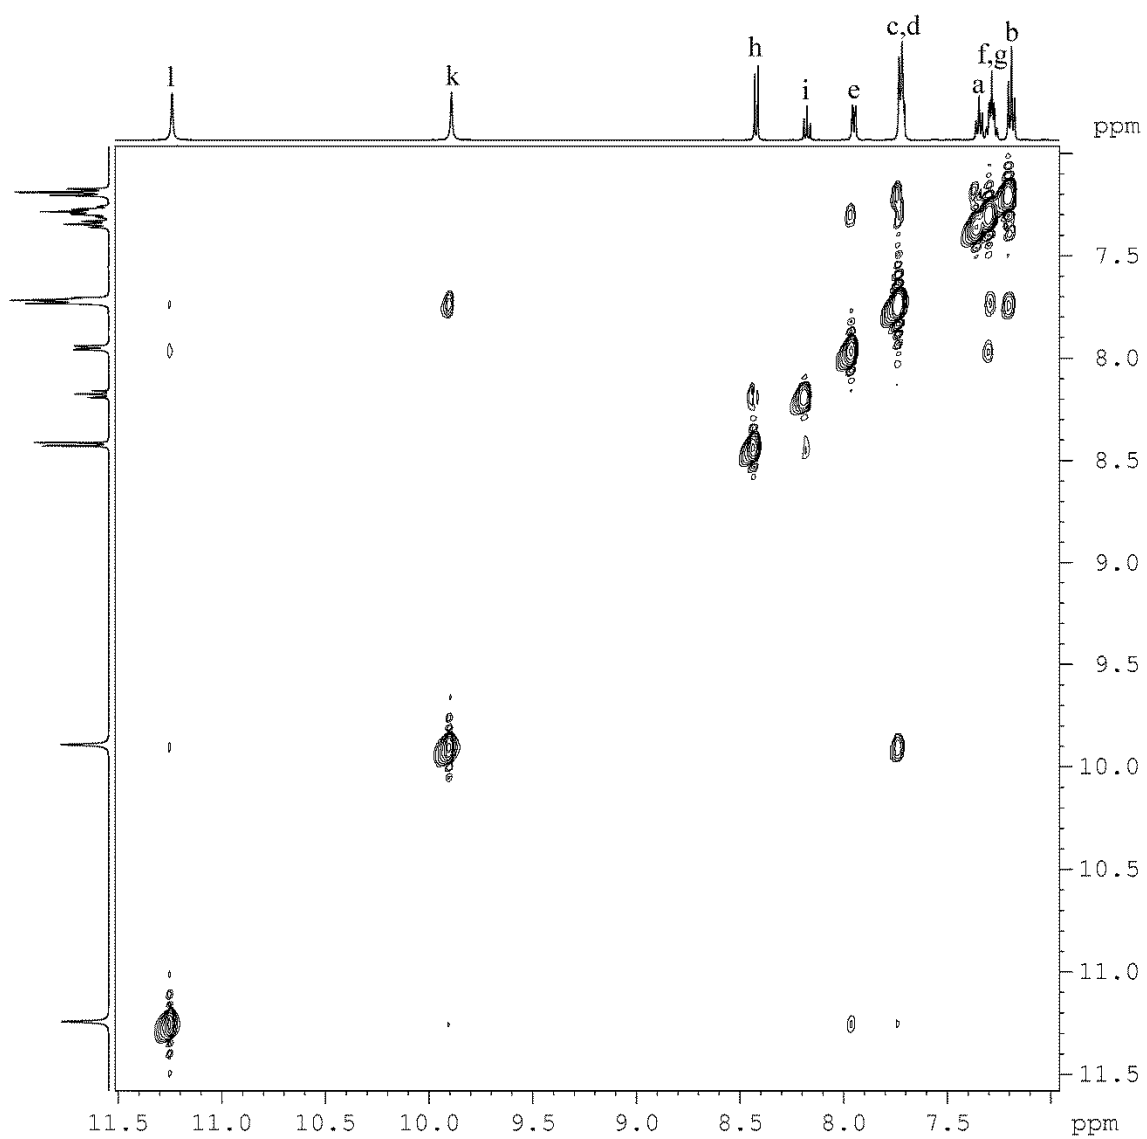

## 6 TGA-DTA measurements

TGA-DTA graph measured from the synthesis product of the benzene variant **2** that was dried in vacuum overnight. The 12.6 % drop in weight is caused by residual THF leaving from the product. Measurement was done under air atmosphere (45.0 ml/min) and the sample was heated from 27 °C to 500 °C at 5.00 °C/min.

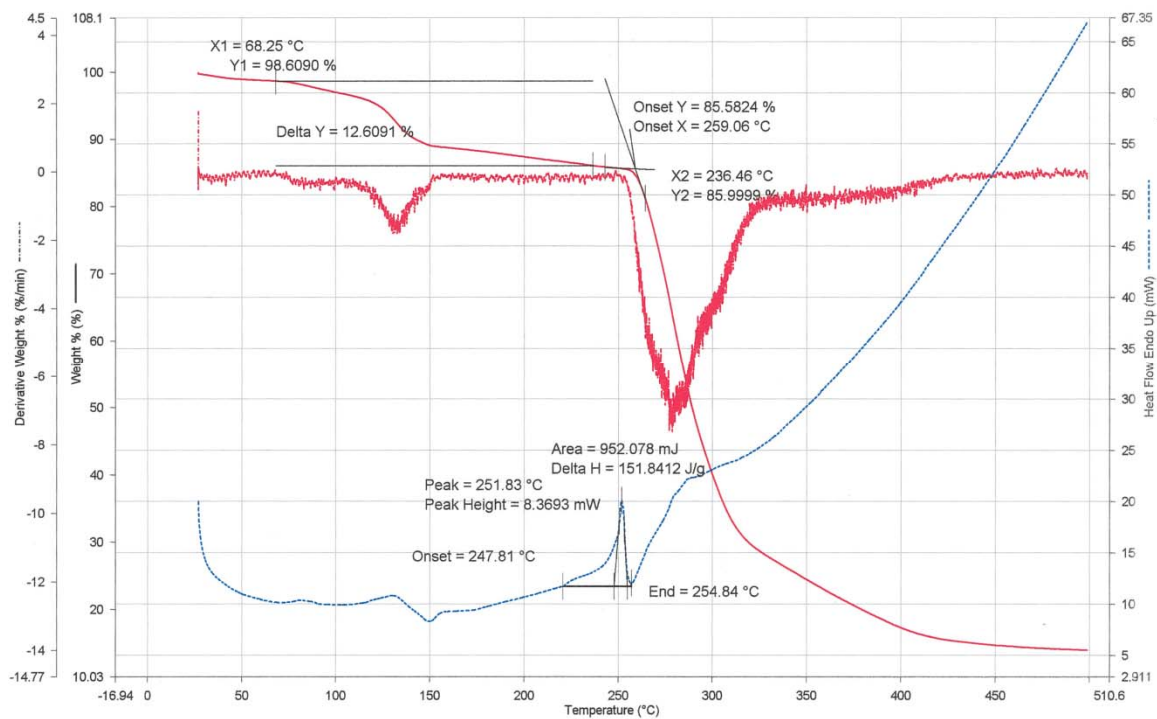

TGA-DTA graph measured from MeCN slurry of the pyridine variant **3**. PXRD measured from the sample shows that the sample is form I. Measurement was done under air atmosphere (45.0 ml/min) and the sample was heated from 27 °C to 350 °C at 5.00 °C/min.

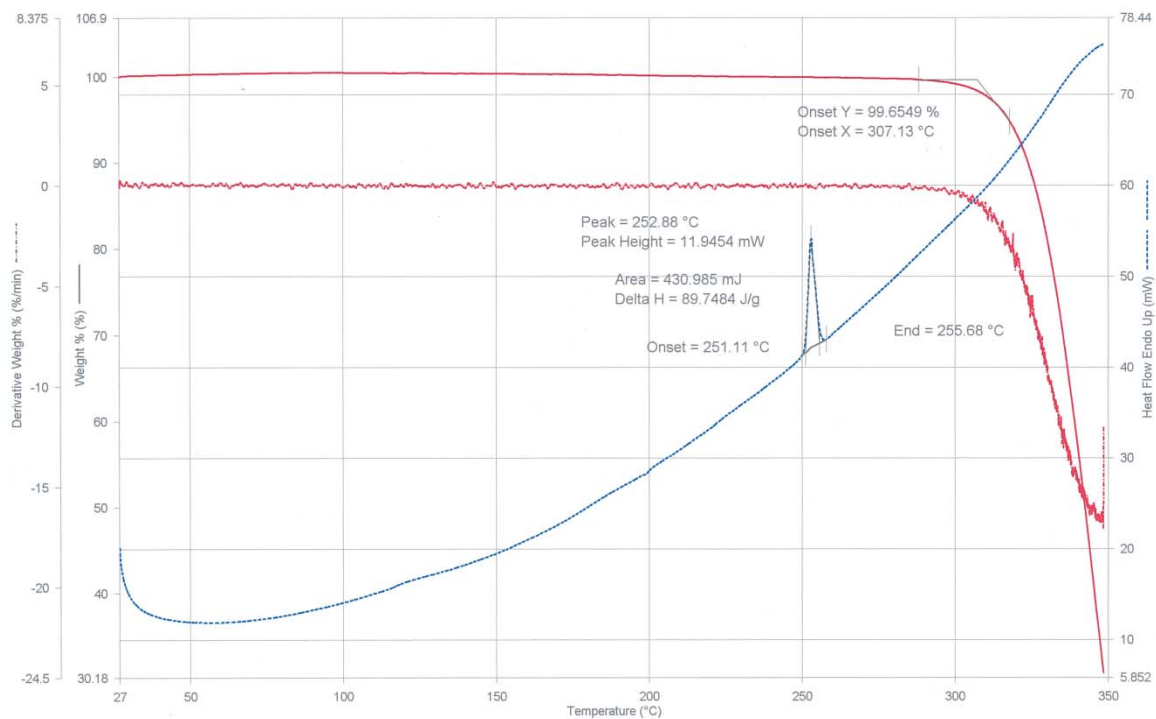

Supplement: c2ce25981h.pdf [file c2ce25981h.pdf]
